# Supplementary material for: Utilizing Liposomal Quercetin and Gallic Acid in Localized Treatment of Vaginal Candida Infections
Source: PubMed Central journal article supplement (PMC7023398; doi:10.3390/pharmaceutics12010009), 2019-12-20
Supplement: pharmaceutics-12-00009-s001.pdf [file pharmaceutics-12-00009-s001.pdf]

# Supplementary Materials: Utilizing Liposomal Quercetin and Gallic Acid in Localized Treatment of Vaginal *Candida* Infections

Barbara Giordani, Purusotam Basnet, Ekaterina Mishchenko, Barbara Luppi and Nataša Škalko-Basnet

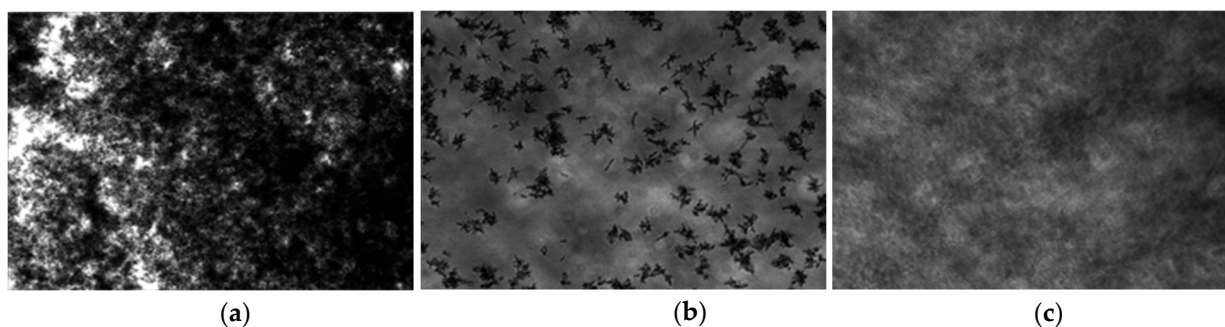

**Figure S1.** Microscopic determination of anti-*Candida* activity. Pictures of (a) *Candida* control (not treated cells); (b) *Candida* cells treated with GA 31  $\mu\text{g}/\text{mL}$  and (c) *Candida* cell treated with GA 125  $\mu\text{g}/\text{mL}$  were obtained using Axiovert 40 Inverted Microscope (20 $\times$ ).
